# Supplementary material
Source: PubMed Central journal article supplement (PMC7553383)
Supplement: cn0c00477_si_001.pdf [file cn0c00477_si_001.pdf]

## Supplementary data

### **A ligand with two modes of interaction with the dopamine D<sub>2</sub> receptor – An induced-fit mechanism of insurmountable antagonism**

Richard Ågren<sup>1,2</sup>, Hugo Zeberg<sup>2</sup>, Tomasz Maciej Stępniewski<sup>3,4,5</sup>, R. Benjamin Free<sup>6</sup>, Sean W. Reilly<sup>7</sup>, Robert R. Luedtke<sup>8</sup>, Peter Århem<sup>1,2</sup>, Francisco Ciruela<sup>9,10</sup>, David R. Sibley<sup>6</sup>, Robert H. Mach<sup>7</sup>, Jana Selent<sup>3</sup>, Johanna Nilsson<sup>1</sup>, Kristoffer Sahlholm<sup>2,11,12\*</sup>

<sup>1</sup> Department of Clinical Neuroscience, Karolinska Institutet, Stockholm, Sweden

<sup>2</sup> Department of Neuroscience, Karolinska Institutet, Stockholm, Sweden

<sup>3</sup> Research Programme on Biomedical Informatics (GRIB), Department of Experimental and Health Sciences of Pompeu Fabra University (UPF)-Hospital del Mar Medical Research Institute (IMIM), 08003 Barcelona, Spain.

<sup>4</sup> InterAx Biotech AG, PARK innovAARE, 5234 Villigen, Switzerland

<sup>5</sup> Faculty of Chemistry, Biological and Chemical Research Centre, University of Warsaw, Warsaw, Poland

<sup>6</sup> Molecular Neuropharmacology Section, National Institute of Neurological Disorders and Stroke, Intramural Research Program, National Institutes of Health, Bethesda, MD 20892-3723, USA.

<sup>7</sup> Department of Radiology, Division of Nuclear Medicine and Clinical Molecular Imaging, University of Pennsylvania Perelman School of Medicine, Philadelphia, PA, USA.

<sup>8</sup> Department of Pharmacology and Neuroscience, University of North Texas Health Science Center, 3500 Camp Bowie Blvd, Fort Worth, TX 76107, USA.

<sup>9</sup> Pharmacology Unit, Department of Pathology and Experimental Therapeutics, Faculty of Medicine and Health Sciences, Institute of Neurosciences, University of Barcelona, L'Hospitalet de Llobregat, Spain.

<sup>10</sup> Neuropharmacology and Pain Group, Neuroscience Program, Institut d'Investigació Biomèdica de Bellvitge, IDIBELL, L'Hospitalet de Llobregat, Spain.

<sup>11</sup> Department of Integrative Medical Biology, Umeå University, Umeå, Sweden

<sup>12</sup> Wallenberg Centre for Molecular Medicine, Umeå University, Umeå, Sweden

\*Corresponding author: [kristoffer.sahlholm@umu.se](mailto:kristoffer.sahlholm@umu.se)

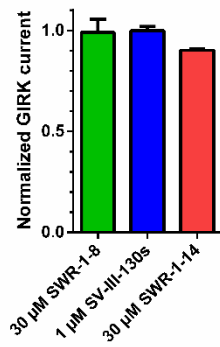

**Figure S1. Effect of competing ligands on GIRK currents in the absence of D2R expression.** Current amplitudes following application of 30  $\mu$ M SWR-1-8 ( $0.99 \pm 0.06$ ), 1  $\mu$ M SV-III-130 ( $1.00 \pm 0.02$ ) and 30  $\mu$ M SWR-1-14 ( $0.90 \pm 0.01$ ), in oocytes injected with GIRK1 and GIRK4.

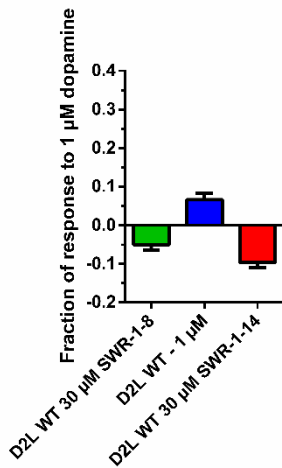

**Figure S2. Intrinsic activities of aripiprazole analogues at WT D<sub>2</sub>R.** Agonist responses of SWR-1-8, SV-III-130 and SWR-1-14 at the D2R, normalized to the response to 1  $\mu$ M DA.

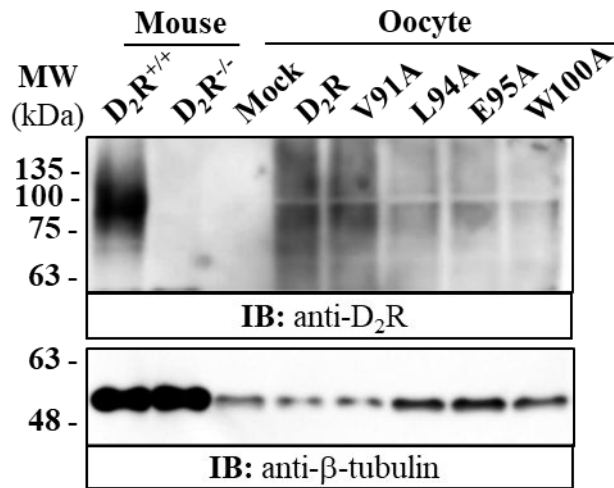

**Figure S3. Expression of WT D<sub>2</sub>R and receptor mutants in oocytes.**

Oocytes were mock manipulated (mock) or injected with WT D<sub>2</sub>R, V91A, L94A, E95A, and W100A mutants. Receptor expression was analyzed by immunoblot using total membranes (2 oocytes/lane). Membranes (1 μg/lane) from WT CD-1 mice (D<sub>2</sub>R<sup>+/+</sup>) and D<sub>2</sub>R knockout (D<sub>2</sub>R<sup>-/-</sup>) mice were also immunoblotted and shown as controls. The immunodetection of β-tubulin was used as loading control.

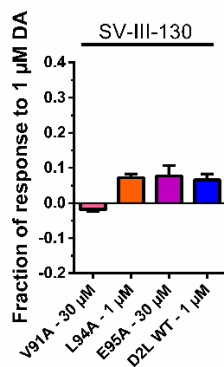

**Figure S4. Intrinsic activities of SV-III-130 at D<sub>2</sub>R mutants.** Agonist responses of SV-III-130 at the V91A, L94A and E95A D<sub>2</sub>R, normalized to the response to 1 μM DA.
